# Supplementary material
Source: PubMed Central journal article supplement (PMC3105650)
Supplement: 2010.036848_2.pdf [file 2010.036848_2.pdf]

**Manuscript no. HAEMATOL/2010/036848 entitled “An apparently silent nucleotide substitution (c.7056C>T) in the von Willebrand factor gene is responsible for type 1 von Willebrand disease“**

**Authors: Viviana Daidone, Lisa Gallinaro, Maria Grazia Cattini, Elena Pontara, Antonella Bertomoro, Antonio Pagnan and Alessandra Casonato**

**Information about the contributions of each person named as having participated in the study**

- 1) Guarantor(s)**, i.e., person(s) who is (are) responsible for the integrity of the work as a whole:
- Alessandra Casonato, University of Padua Medical School, sandra.casonato@unipd.it
  - Viviana Daidone, University of Padua Medical School, viviana.daidone@unipd.it

According to the International Committee of Medical Journal Editors (ICMJE) ([http://www.icmje.org/ethical\\_1author.html](http://www.icmje.org/ethical_1author.html)): “*Authorship credit should be based on: 1) substantial contributions to conception and design, acquisition of data, or analysis and interpretation of data; 2) drafting the article or revising it critically for important intellectual content; and 3) final approval of the version to be published. Authors should meet conditions 1, 2, and 3 ..... Acquisition of funding, collection of data, or general supervision of the research group alone does not constitute authorship*”.

The guarantors of this manuscript confirm that all persons designated as authors qualify for authorship, and that each author has participated sufficiently in the work to take public responsibility for appropriate portions of the content.

2) Authors who participated in the **conception of the study**: Alessandra Casonato and Viviana Daidone

- 3) **Design & Methods**. The following authors were responsible for specific investigations:
- Alessandra Casonato designed the research
  - Viviana Daidone was responsible for genetic analysis
  - Elena Pontara was responsible for haemostatic analysis
  - Maria Grazia Cattini was responsible for the cellular cultures and expression experiments

- 4) **Results**. The following authors were responsible for specific portions of the results, including figures and tables
- Alessandra Casonato analyzed and discussed the results
  - Antonio Pagnan discussed the results
  - Antonella Bertomoro took part in recruiting and characterizing patients and proband's relatives
  - Elena Pontara took part in the haemostatic analysis and performed the VWF multimeric analysis
  - Maria Cattini took part in the haemostatic analysis and performed the in vitro expression experiments
  - Lisa Gallinaro took part in the genetic analysis
  - Viviana Daidone was responsible for figures and tables and analyzed the data

- 5) **Writing the manuscript**. The following authors were responsible for writing the manuscript:
- Alessandra Casonato and Viviana Daidone **were responsible for writing the manuscript**

6) **Contributors Listed in Acknowledgments**: This work was supported by a grant from the Ministero dell'Universita' e della Ricerca Scientifica e Tecnologica (MURST, 60%, 2008)
